# Supplementary material for: Rumen and plasma metabolomics profiling by UHPLC-QTOF/MS revealed metabolic alterations associated with a high-corn diet in beef steers
Source: PubMed Central journal article supplement (PMC6261619; doi:10.1371/journal.pone.0208031), 2018-11-28
Supplement: pone.0208031.s006.pdf [file pone.0208031.s006.pdf]

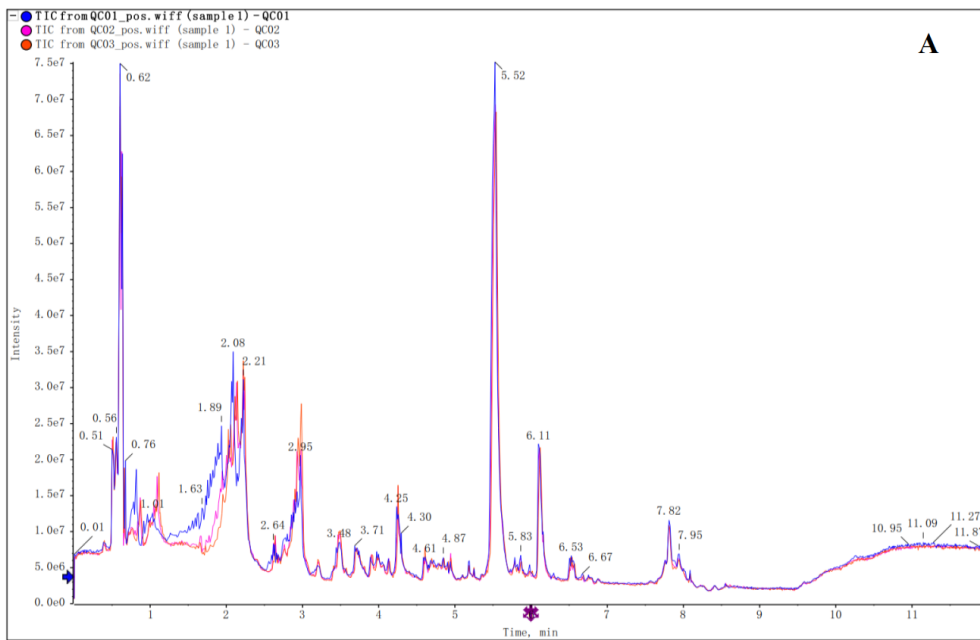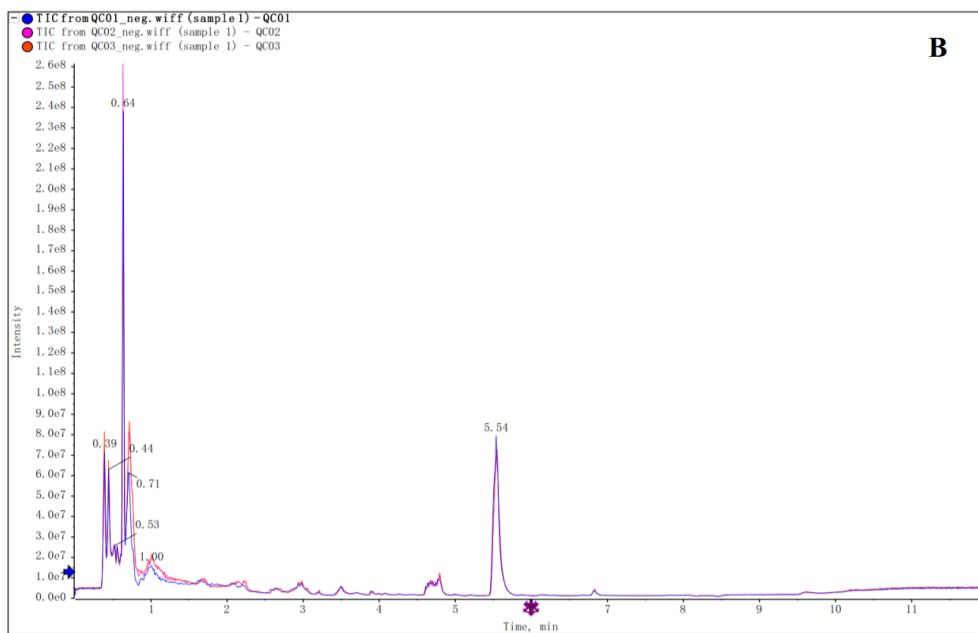

**S2 Fig. Tic diagram of QC samples.** A was derived from POS and B was derived from NEG.
