# Supplementary material for: Rumen and plasma metabolomics profiling by UHPLC-QTOF/MS revealed metabolic alterations associated with a high-corn diet in beef steers
Source: PLOS journal article supplement (doi:10.1371/journal.pone.0208031), 2018-11-28
Supplement: S7 (10.1371/journal.pone.0208031.s007) [file journal.pone.0208031.s007]

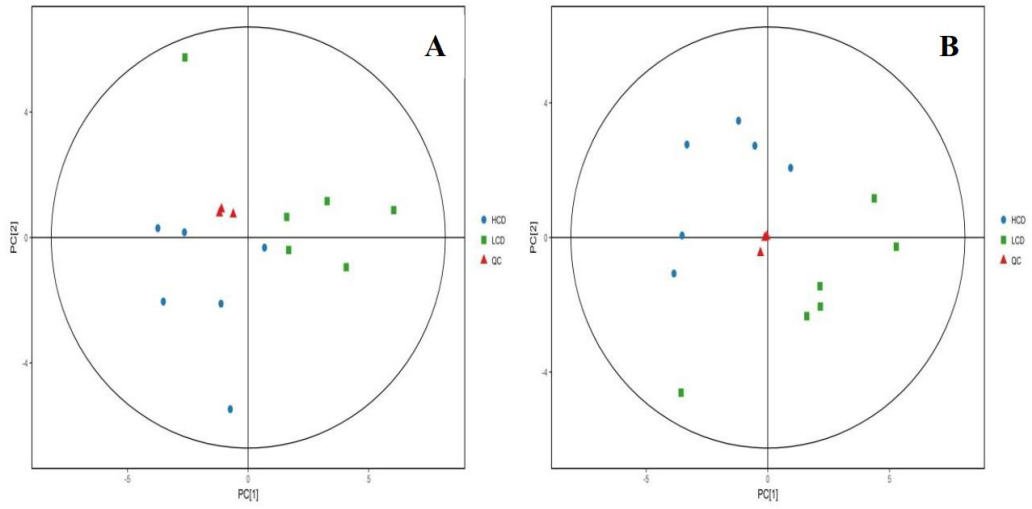

**S3 Fig. Score scatter plot of the PCA model.** A was derived from POS and B was derived from NEG. Red triangle were QC samples.
